# Supplementary material for: A synergistic therapeutic nano-eyedrop for dry eye disease based on ascorbic acid-coupled exosomes
Source: Royal Society of Chemistry journal article supplement (doi:10.1039/d2nr05178h), 2022-12-16
Supplement: d2nr05178h1.pdf [file d2nr05178h1.pdf]

# Supporting Information

## A Synergistic Therapeutic Nano Eyedrop for Dry Eye Disease Based on Ascorbic Acid- Coupled Exosomes

*Fang Ma<sup>a, b, ‡</sup>, Jing Feng<sup>a, b, ‡</sup>, Xi Liu<sup>c</sup>, Ying Tian<sup>a, b</sup>, Wen-Jing Wang<sup>d, b</sup>, Fu-Xiao Luan<sup>a, b</sup>, Ying-Jie Wang<sup>a, b</sup>, Wei-Qiang Yang<sup>a, b</sup>, Jing-Yi Bai<sup>a, e</sup>, Yi-Quan Zhang<sup>a, b</sup> and Yong Tao<sup>a, \*</sup>*

<sup>a</sup> Department of Ophthalmology, Beijing Chaoyang Hospital, Capital Medical University, Beijing 100020, P.R. China.

<sup>b</sup> State Key Laboratory of Biochemical Engineering, Institute of Process Engineering, Chinese Academy of Sciences, Beijing 100080, P. R. China.

<sup>c</sup> Research Center for Tissue Repair and Regeneration affiliated to the Medical Innovation Research Department and 4th Medical Center, PLA General Hospital and PLA Medical College, Beijing 100048, P. R. China.

<sup>d</sup> Department of Neurosurgery, Health Science Center, The First Affiliated Hospital of Shenzhen University, Shenzhen Second People's Hospital, Shenzhen 518035, P. R. China.

<sup>e</sup> Department of Ophthalmology, Beijing Huairou Hospital, Capital Medical University, Beijing 101400, P.R. China.

<sup>‡</sup> These authors contributed equally to this work.

\*Corresponding author

E-mail: [taoyong@bjcyh.com](mailto:taoyong@bjcyh.com)

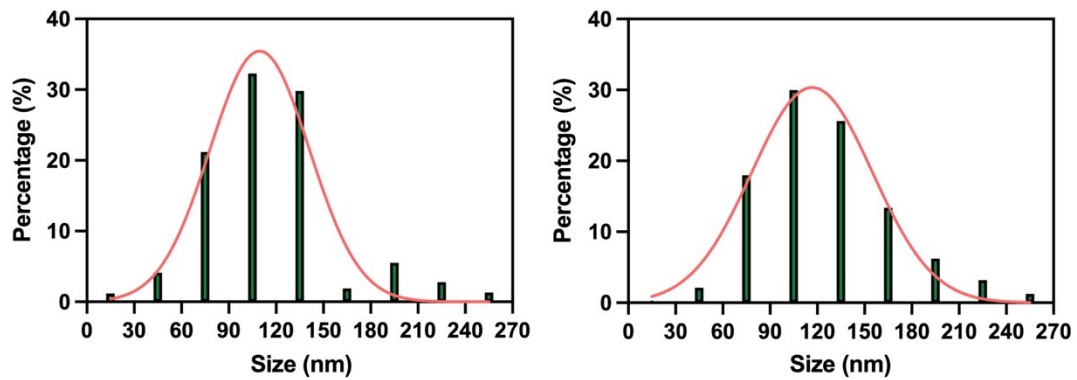

**Figure S1** Particle size distribution of mEXO and mExo@AA.

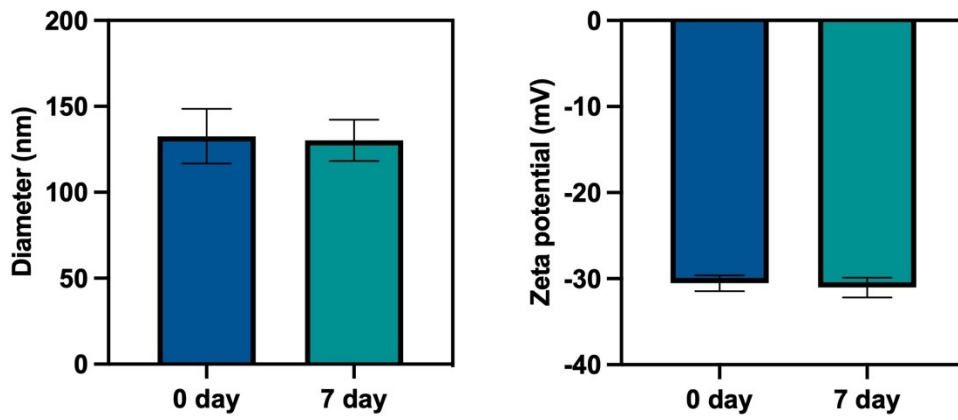

**Figure S2** Particle size and zeta potential of mExo@AA stored in PBS at -80 °C for day 0 and day 7.

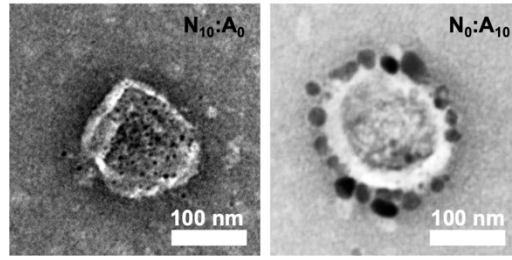

**Figure S3** TEM images of mExo@AA in the ratio of  $N_{10}:A_0$  and  $N_0:A_{10}$ .

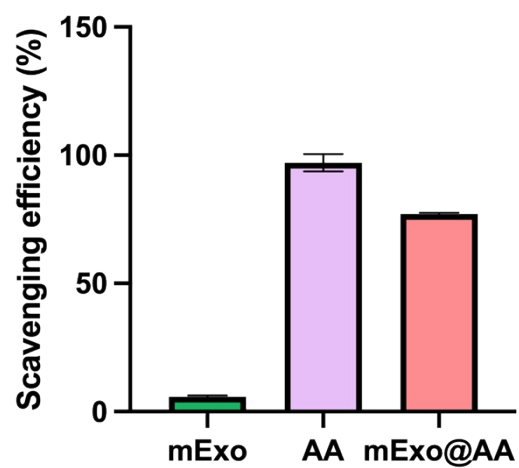

**Figure S4** ROS scavenging efficiency of mExo (0.5 mg/mL), AA (254.5 nM/mL) and mExo@AA (0.5 mg/mL).

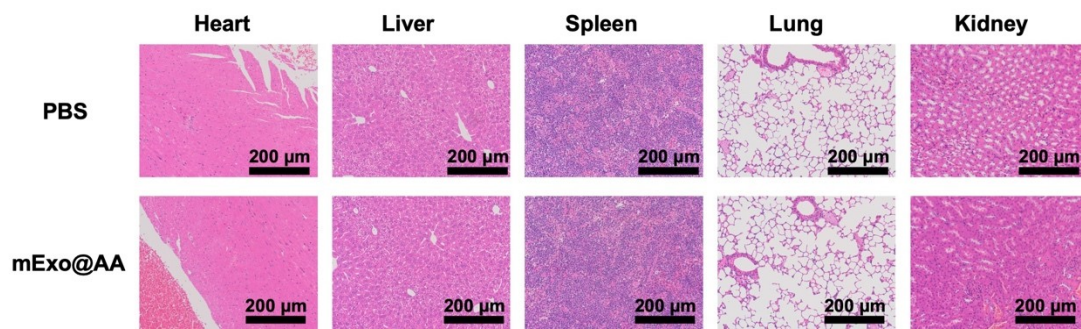

**Figure S5** HE staining section images of the major organs excised from the healthy mice 7 days after drop with PBS and mExo@AA.
